# Supplementary material for: IL-6/STAT3/Foxo1 axis as a target of lycopene ameliorates the atrazine-induced thymic mitophagy and pyroptosis cross-talk
Source: Royal Society of Chemistry journal article supplement (doi:10.1039/d2fo01497a), 2022-01-01
Supplement: d2fo01497a1.pdf [file d2fo01497a1.pdf]

1 **L-6/STAT3/Foxo1 Axis as a Target of Lycopene Ameliorates**

2 **Atrazine-Induced Thymic Mitophagy and Pyroptosis Cross-talk**

3 Shi-Yong Zhu<sup>a</sup>, Chen-Xi Li<sup>a</sup>, Yu-Xuan Tong<sup>a</sup>, Ya-Ru Xu<sup>a</sup>, Zhao-Yi Wang<sup>a</sup>, Jin-Long Li<sup>a, b, c,\*</sup>

---

4 *\*Corresponding author.*

5 *<sup>a</sup>College of Veterinary Medicine, Northeast Agricultural University, Harbin, 150030, P. R. China. E-mail: [Jinlongli@neau.edu.cn](mailto:Jinlongli@neau.edu.cn) Tel:*

6 *+86 451 55190407.*

7 *<sup>b</sup>Heilongjiang Key Laboratory for Laboratory Animals and Comparative Medicine, Northeast Agricultural University, Harbin, 150030,*

8 *P. R. China.*

9 *<sup>c</sup>Key Laboratory of the Provincial Education Department of Heilongjiang for Common Animal Disease Prevention and Treatment, Northeast*

10 *Agricultural University, Harbin, 150030, P. R. China*

11

**Table S1. The information of experimental grouping and treatment**

| <b>The Name of Group</b> | <b>Drug treatment (Intragastrical administration)</b> |                                 |
|--------------------------|-------------------------------------------------------|---------------------------------|
|                          | <b>Moring administration</b>                          | <b>Afternoon administration</b> |
| Control                  | water                                                 | corn oil                        |
| Vcon                     | water                                                 | water                           |
| Lyc                      | water                                                 | 5 mg/kg Lyc in corn oil         |
| ATZ1                     | 50 mg/kg ATZ in water                                 | corn oil                        |
| ATZ2                     | 200 mg/kg ATZ in water                                | corn oil                        |
| ATZ1+L                   | 50 mg/kg ATZ in water                                 | 5 mg/kg Lyc in corn oil         |
| ATZ2+L                   | 200 mg/kg ATZ in water                                | 5 mg/kg Lyc in corn oil         |

12

**Table S2. The information of reagents in the work**

| <b>Name</b>                                           | <b>Catalogue</b> | <b>Manufacture</b> | <b>City</b> | <b>Country</b> |
|-------------------------------------------------------|------------------|--------------------|-------------|----------------|
| Atrazine                                              | A821828          | MACKLIN            | Shanghai    | China          |
| Lycopene                                              | L823832          | MACKLIN            | Shanghai    | China          |
| DHE                                                   | S0063            | Beyotime           | Shanghai    | China          |
| DAPI                                                  | C1002            | Beyotime           | Shanghai    | China          |
| Total protein extraction kit                          | MA0171           | meilunbio          | Dalian      | China          |
| ECL                                                   | MA0186           | meilunbio          | Dalian      | China          |
| QuantiCyto <sup>®</sup> Mouse TNF- $\alpha$ ELISA kit | EMC102a.48       | neobioscience      | Shenzhen    | China          |
| QuantiCyto <sup>®</sup> Mouse IL-6 ELISA kit          | EMC004.48        | neobioscience      | Shenzhen    | China          |
| QuantiCyto <sup>®</sup> Mouse IL-10 ELISA kit         | EMC005.48        | neobioscience      | Shenzhen    | China          |

**Table S3. The information of antibodies using in western blot**

| <b>Name</b>                                      | <b>Source</b> | <b>Dilution</b> | <b>Catalogue</b> | <b>Manufactur<br/>e</b>      | <b>City</b> | <b>Country</b> |
|--------------------------------------------------|---------------|-----------------|------------------|------------------------------|-------------|----------------|
| AIM2                                             | Rabbit        | 1: 1000         | A3356            | ABclonal                     | Wuhan       | China          |
| AKT1                                             | Rabbit        | 1: 1000         | bs-0115R         | Bioss                        | Beijing     | China          |
| Asc                                              | Rabbit        | 1: 1000         | A1170            | ABclonal                     | Wuhan       | China          |
| $\beta$ -actin                                   | Rabbit        | 1: 2000         | AC026            | ABclonal                     | Wuhan       | China          |
| CD45                                             | Mouse         | 1: 1000         | 60287-1-Ig       | proteintech                  | Wuhan       | China          |
| caspase-1                                        | Rabbit        | 1: 1000         | bs-0169R         | Bioss                        | Beijing     | China          |
| caspase-1 p20                                    | Rabbit        | 1: 1000         | bs-6368R         | Bioss                        | Beijing     | China          |
| Foxo1                                            | Rabbit        | 1: 2000         | 18592-1-AP       | proteintech                  | Wuhan       | China          |
| GAPDH                                            | Rabbit        | 1: 2000         | AF7021           | Affinity<br>Biosciences      | Jiangsu     | China          |
| GSDMD N terminal                                 | Rabbit        | 1: 800          | A20197           | ABclonal                     | Wuhan       | China          |
| JNK                                              | Rabbit        | 1: 2000         | 9252T            | Cell Signaling<br>Technology | Danvers     | USA            |
| LC3B                                             | Rabbit        | 1: 1000         | A19665           | ABclonal                     | Wuhan       | China          |
| Nfkb                                             | Rabbit        | 1: 1000         | WL01980          | Wanleibio                    | Shenyang    | China          |
| Nlrp3                                            | Rabbit        | 1: 1500         | Bs-10021R        | Bioss                        | Beijing     | China          |
| p62                                              | Rabbit        | 1: 1000         | bs-2951R         | Bioss                        | Beijing     | China          |
| PI3K                                             | Rabbit        | 1: 1000         | bs-4159R         | Bioss                        | Beijing     | China          |
| Pink1                                            | Rabbit        | 1: 1500         | A11435           | Abconal                      | Shanghai    | China          |
| p-STAT3                                          | Rabbit        | 1: 1000         | WLP2412          | Wanleibio                    | Shenyang    | China          |
| SOD2                                             | Rabbit        | 1: 1000         | A1340            | ABclonal                     | Wuhan       | China          |
| STAT3                                            | Rabbit        | 1: 1000         | WL01836          | Wanleibio                    | Shenyang    | China          |
| HRP conjugated<br>secondary<br>antibody (Rabbit) | Goat          | 1: 3000         | ZB-2301          | ZSGB-BIO                     | Beijing     | China          |
| HRP conjugated<br>secondary<br>antibody (Mouse)  | Goat          | 1: 3000         | ZB-2305          | ZSGB-BIO                     | Beijing     | China          |

**Table S4. The information of antibodies using in immunofluorescence staining**

| <b>Name</b>                                   | <b>Source</b> | <b>Dilution</b> | <b>Catalogue</b> | <b>Manufacture</b> | <b>City</b> | <b>Country</b> |
|-----------------------------------------------|---------------|-----------------|------------------|--------------------|-------------|----------------|
| Tom20                                         | Rabbit        | 1: 200          | A18047           | ABclonal           | Wuhan       | China          |
| Foxo1                                         | Rabbit        | 1: 300          | 18592-1-AP       | proteintech        | Wuhan       | China          |
| Parkin                                        | Mouse         | 1: 300          | ab77924          | Abcam              | Boston      | USA            |
| 3-Nitrotyrosine                               | Mouse         | 1: 300          | ab61392          | Abcam              | Boston      | USA            |
| Coralite594 conjugated secondary antibody     | Goat          | 1:200           | SA00013-4        | proteintech        | Wuhan       | China          |
| Alexa Fluor 488 conjugated secondary antibody | Goat          | 1: 500          | ab150113         | Abcam              | Boston      | USA            |

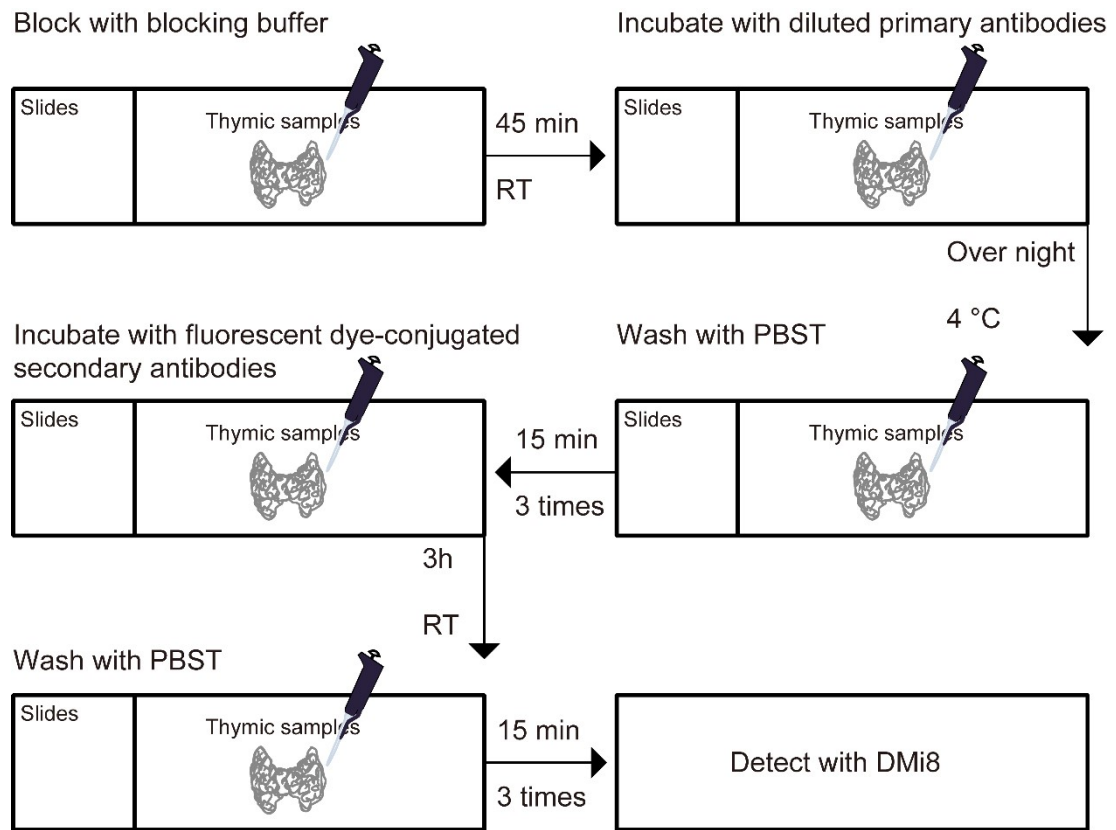

19  
 20 **Fig. S1 The schematization of immunofluorescence**

21  
 22

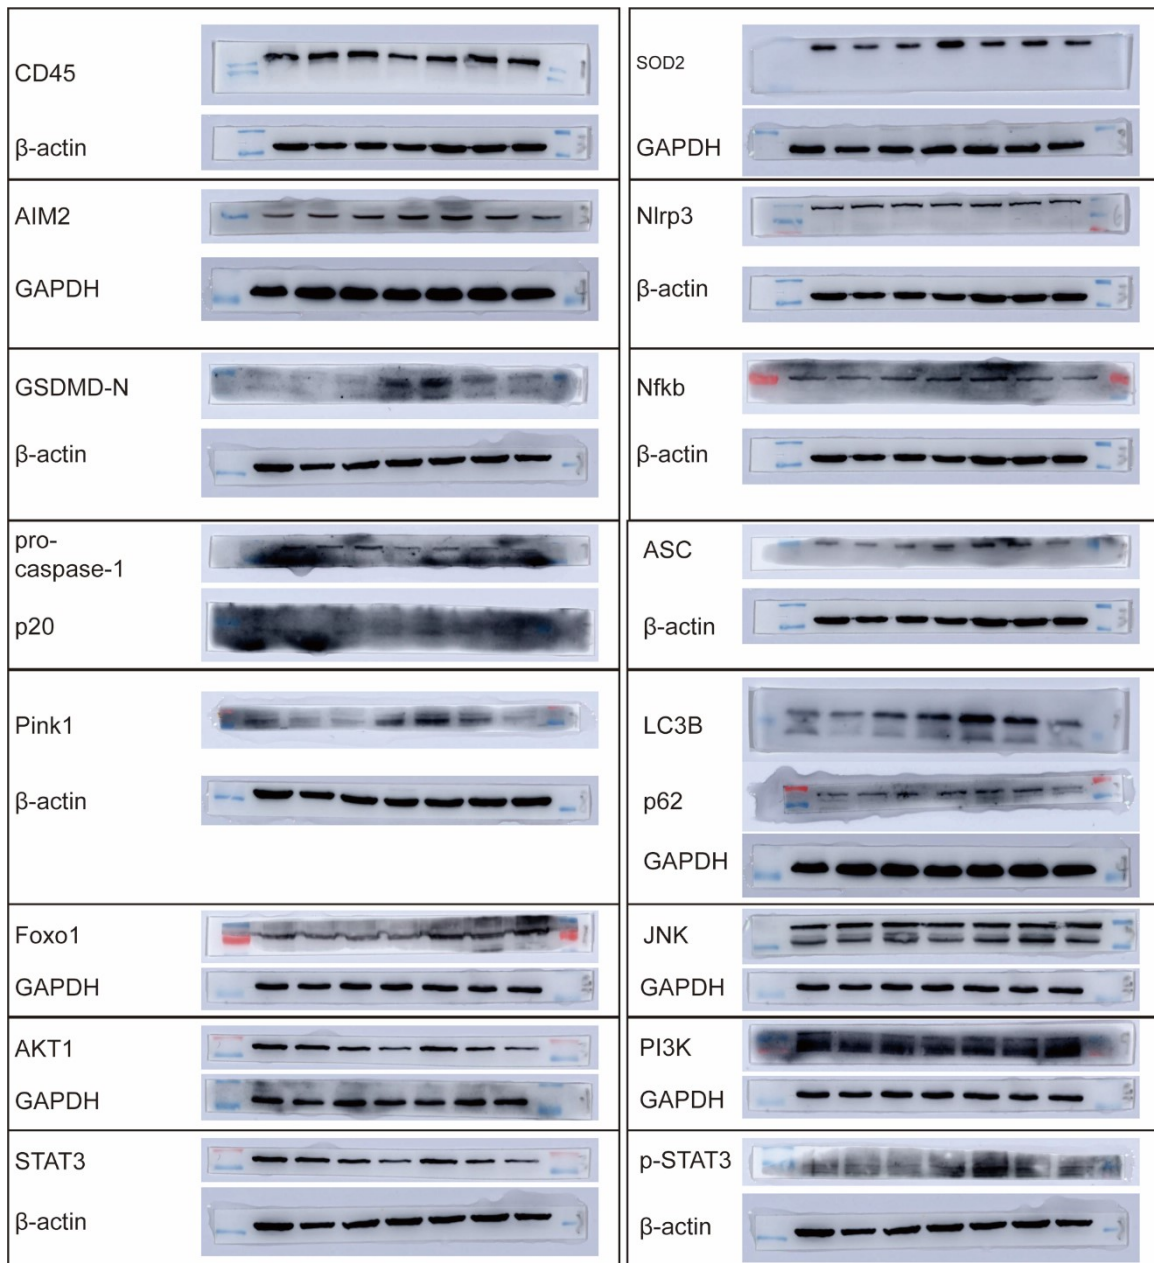

23

24 **Fig. S2 Original western blot gels used in the study**
